# Supplementary material for: Single Nucleotide Polymorphisms in the Metastasis-associated in Colon Cancer-1 Gene Predict the Recurrence of Hepatocellular Carcinoma after Transplantation
Source: PubMed Central journal article supplement — Int J Med Sci. 2014 Jan 5;11(2):142–50. doi: 10.7150/ijms.7142 (PMC3894398; doi:10.7150/ijms.7142), 2014-01-05
Supplement: ijmsv11p0142s1.pdf [file ijmsv11p0142s1.pdf]

# Supplementary Material

**Table S1 MACC1 extension primer sequences**

| Target      | Sequence                       |
|-------------|--------------------------------|
| rs1990172-F | 5' ATGTAGTTTCCCAATCAGG 3'      |
| rs1990172-R | 5' TTTTAAAGAAAGCAGAAGCCT 3'    |
| rs3735615-F | 5' CTCCAGTGTTTAGTCACAGGGT 3'   |
| rs3735615-R | 5' TCTACTCCACACTACTCCAATCTA 3' |
| rs4721888-F | 5' ATTCTTTTCATCTTCCAGCAT 3'    |
| rs4721888-R | 5' GCCAGCCTGTATATGTATGC 3'     |
| rs2241056-F | 5' GTGGGGTGTAAGCGGTGAT 3'      |
| rs2241056-R | 5' TCTTTGGCTTACCCACATTTC 3'    |
| rs975263-F  | 5' GAGCCTCCCAATGGTGAAC 3'      |
| rs975263-R  | 5' GTTACCCCATAGTTGCTAAAGTTC 3' |

**Table S2 Genotype and allele frequencies of tumorous tissue and adjacent normal tissue**

| SNP              | Adjacent normal tissue n (%) | tumorous tissue n (%) | P value            |
|------------------|------------------------------|-----------------------|--------------------|
| <b>rs1990172</b> |                              |                       |                    |
| GG               | 80(73.4)                     | 83(76.2)              | 0.894 <sup>a</sup> |
| GT               | 28(25.7)                     | 25(22.9)              |                    |
| TT               | 1(0.9)                       | 1(0.9)                |                    |
| G allele         | 188(86.2)                    | 191(87.6)             | 0.777 <sup>b</sup> |
| T allele         | 30(13.8)                     | 27(12.4)              |                    |
| <b>rs3735615</b> |                              |                       |                    |
| GG               | 83(73.5)                     | 84(74.3)              | 0.880 <sup>a</sup> |
| CG               | 30(26.5)                     | 29(25.7)              |                    |
| CC               | 0(0)                         | 0(0)                  |                    |
| G allele         | 196(86.7)                    | 197(87.2)             | 1.000 <sup>b</sup> |
| C allele         | 30(13.3)                     | 29(12.8)              |                    |
| <b>rs4721888</b> |                              |                       |                    |
| GG               | 74(65.5)                     | 75(66.4)              | 0.989 <sup>a</sup> |
| CG               | 31(27.4)                     | 30(26.5)              |                    |
| CC               | 8(7.1)                       | 8(7.1)                |                    |
| G allele         | 179(79.2)                    | 180(79.6)             | 1.000 <sup>b</sup> |
| C allele         | 47(20.8)                     | 46(20.4)              |                    |
| <b>rs2241056</b> |                              |                       |                    |
| GG               | 57(50.5)                     | 59(52.2)              | 0.889 <sup>a</sup> |
| AG               | 52(46.0)                     | 49(43.4)              |                    |
| AA               | 4(3.5)                       | 5(4.4)                |                    |
| G allele         | 166(73.5)                    | 167(73.9)             | 1.000 <sup>b</sup> |
| A allele         | 60(26.5)                     | 59(26.1)              |                    |
| <b>rs975263</b>  |                              |                       |                    |
| TT               | 78(70.9)                     | 82(74.6)              | 0.647 <sup>a</sup> |
| CT               | 31(28.2)                     | 26(23.6)              |                    |
| CC               | 1(0.9)                       | 2(1.8)                |                    |
| T allele         | 187(85.0)                    | 190(86.4)             | 0.786 <sup>b</sup> |
| C allele         | 33(15.0)                     | 30(13.6)              |                    |

<sup>a</sup> $\chi^2$  test. (Pearson  $\chi^2$  test). <sup>b</sup> $\chi^2$  test. (Fisher's exact test).
